# Supplementary material for: Effective Radiosensitization of Bladder Cancer Cells by Pharmacological Inhibition of DNA-PK and ATR
Source: MDPI journal article supplement (doi:10.3390/biomedicines10061277), 2022-05-30
Supplement: s1 [file s1]

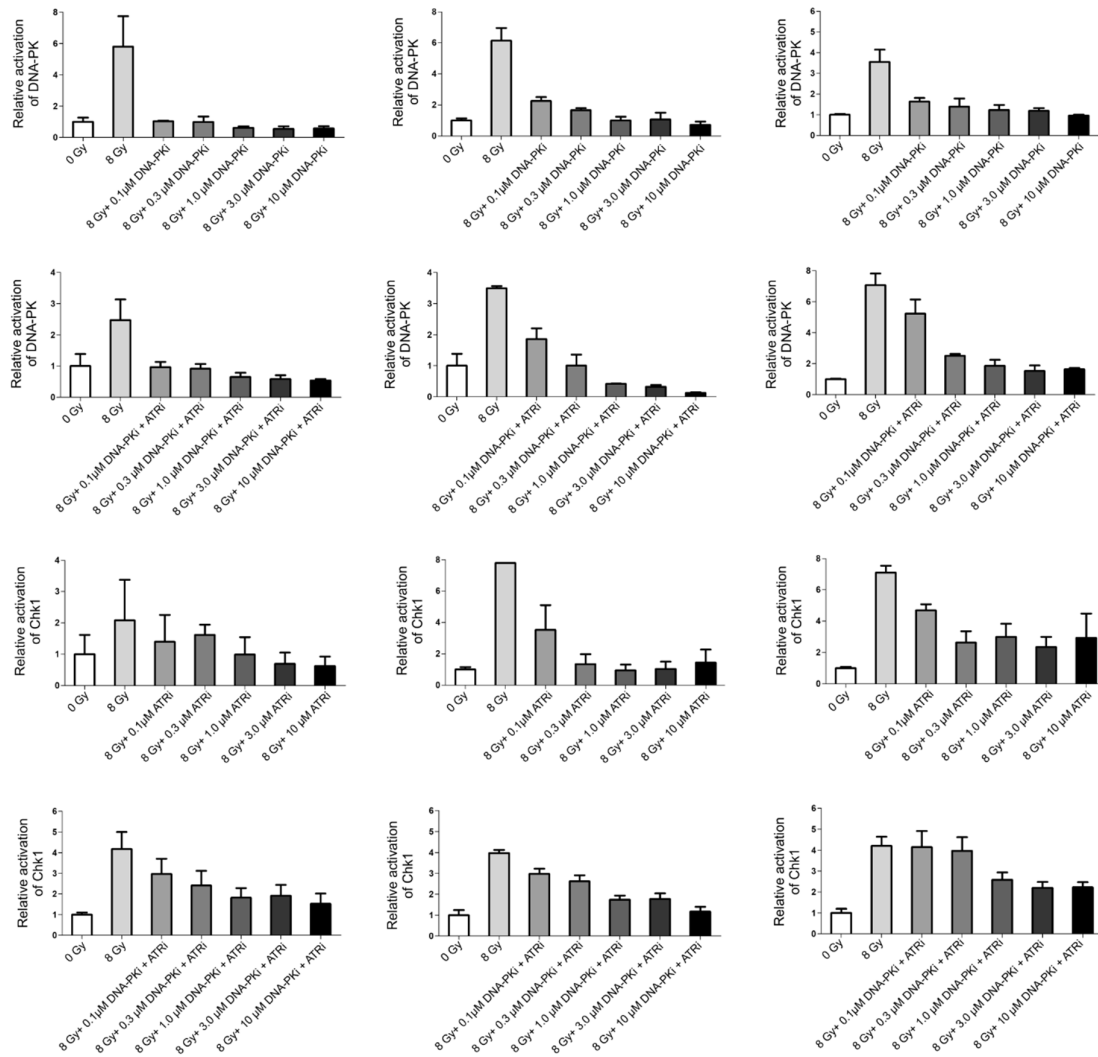

**Supplementary Figure S4:** Densitometric quantification of western blot-based protein expression and activation (ATR and DNA-PK). After standardization by loading control (GAPDH), the relative activation of DNA-PK and Chk1 (p-DNA-PK respectively p-CHK1) was determined by normalizing to the total amount of protein (total DNA-PK respectively total CHK1). Densitometric data represent means from at least n=3 independent experiments.
