# Supplementary material for: Effective Radiosensitization of Bladder Cancer Cells by Pharmacological Inhibition of DNA-PK and ATR
Source: MDPI journal article supplement (doi:10.3390/biomedicines10061277), 2022-05-30
Supplement: s1 [file s1]

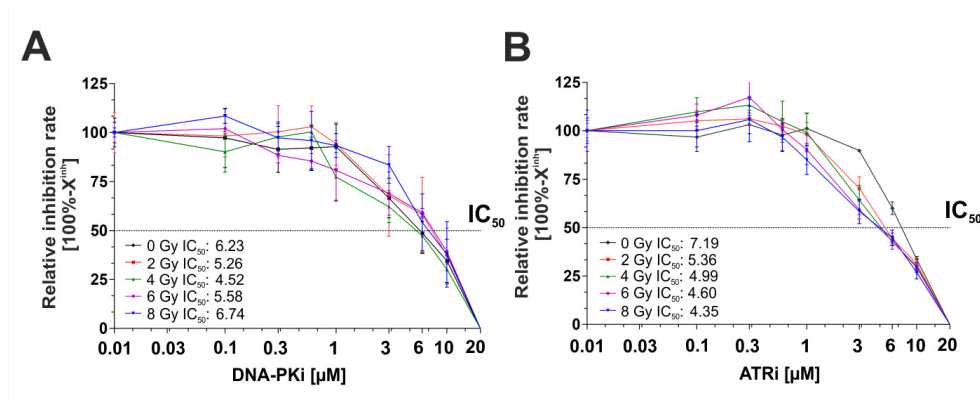

**Supplementary Figure S1:** (A-B) IC<sub>50</sub> values of ATR and DNA-PK inhibitors with and without ionizing radiation of the normal urothelial cell line UROtsa. Short-term single drug response analyses applying DNA-PK and ATR inhibitors upon different radiation doses (0 Gy, 2 Gy, 4 Gy, 6 Gy, 8 Gy) are illustrated. Semi-logarithmic plots show drug response curves (relative inhibition rate = 100% -  $X_{inh}$ ). The drug response was determined using XTT assay following 72h incubation with indicated drug concentrations and radiation doses. Dotted line and stated relative IC<sub>50</sub>= drug concentration causing 50% inhibition. Drug response curves represent means from at least n=3 independent experiments.
