# Supplementary material for: Effective Radiosensitization of Bladder Cancer Cells by Pharmacological Inhibition of DNA-PK and ATR
Source: MDPI journal article supplement (doi:10.3390/biomedicines10061277), 2022-05-30
Supplement: s1 [file s1]

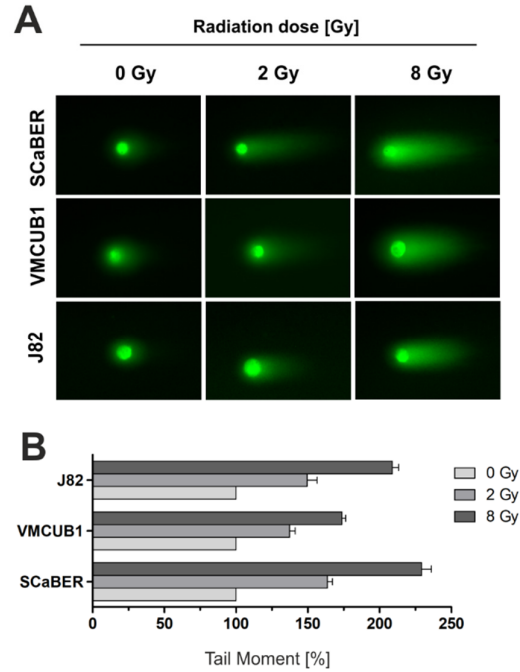

**Supplementary Figure S2:** A comet assay was performed to assess radiation induced DNA damage upon different radiation doses (2 Gy and 8 Gy). Cells without irradiation were used as control. **(A)** Representative immunofluorescence images of stained nuclear tails are shown for each cell line and radiation dose. **(B)** Semi-quantitative analyses of the Tail Moment upon irradiation for SCaBER, VMCUB-1 and J82 cells. Overall n= 1496 individual cells with corresponding tails were analyzed by image j. The 0 Gy control was used for normalization.
