# Supplementary material for: Effective Radiosensitization of Bladder Cancer Cells by Pharmacological Inhibition of DNA-PK and ATR
Source: MDPI journal article supplement (doi:10.3390/biomedicines10061277), 2022-05-30
Supplement: s1 [file s1]

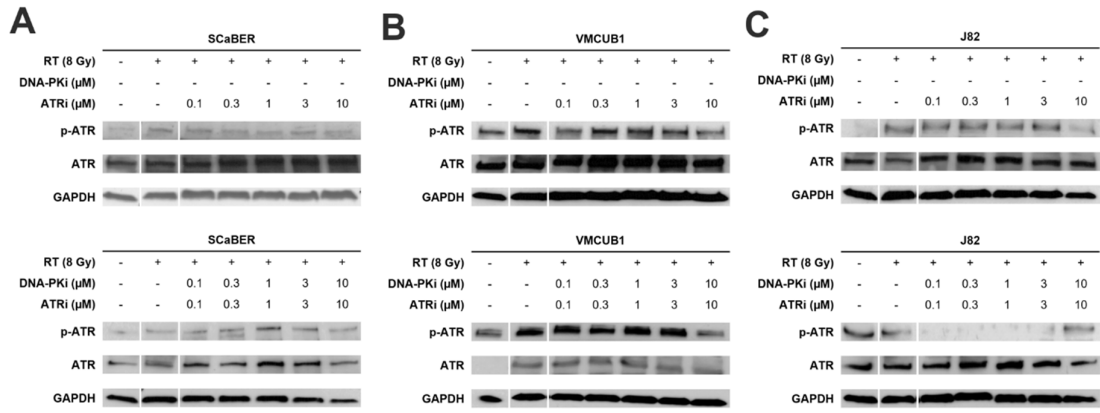

**Supplementary Figure S3:** Phospho-western blots were performed to assess activation of ATR upon irradiation (radiation dose = 8Gy) as well as single and dual DNA-PK/ATR inhibition in SCaBER (A), VMCUB-1 (B) and J82 (C) bladder cancer cells. ATR phosphorylation at the position Thr1989 was not blocked upon single/dual treatment of increased concentrations of AZD7648 and ceralasertib.
