# Supplementary material for: Effective Radiosensitization of Bladder Cancer Cells by Pharmacological Inhibition of DNA-PK and ATR
Source: Biomedicines. 2022 May 30;10(6):1277. doi: 10.3390/biomedicines10061277 (PMC9220184; doi:10.3390/biomedicines10061277)
Supplement: Supplementary file 1 [file biomedicines-10-01277-s001.zip]

Archive with 5 entries (5 files):
- biomedicines-1715586-supplementary/Supplementary Figure S1.pdf
- biomedicines-1715586-supplementary/Supplementary Figure S2.pdf
- biomedicines-1715586-supplementary/Supplementary Figure S3.pdf
- biomedicines-1715586-supplementary/Supplementary Figure S4.pdf
- biomedicines-1715586-supplementary/Table S1.xlsx
