# Supplementary material for: Effective Radiosensitization of Bladder Cancer Cells by Pharmacological Inhibition of DNA-PK and ATR
Source: Biomedicines. 2022 May 30;10(6):1277. doi: 10.3390/biomedicines10061277 (PMC9220184; doi:10.3390/biomedicines10061277)
Supplement: Supplementary file 1 [file biomedicines-10-01277-s001.zip › biomedicines-1715586-supplementary/Table S1.xlsx]

## Sheet: Supp Table S1
Supplementary Table S1: TP53 altertaions in used cell lines
SCaBER
Chr	Start	End	Size	Ref	Alt	Type	Region	EnsGene	EnsRNA	EnsProt	Strand	Biotype	HGNC	CCDS	RefSeq	Dist5SS	Dist3SS	MutPos	ConseqClass	Consequence	MutCDNA	MutProt	InhouseFreq	VarFreq	VarInfo	MedPred	Prediction	Phen-P	Phenomizer Description	GrA	GrB	BrdA	BrdB	A:PRID4683:SID137767:AID124244:Scaber									Clinvar Database	Pathogenicity Prediction
17	7676040	7676040	1	C	A	SNV		ENSG00000141510	ENST00000617185	ENSP00000482258	-1	protein_coding	TP53	CCDS45606.1	NM_001126114.2	-47	-233	CDS.4	MISSENSE	MISSENSE	c.329G>T	p.Arg110Leu			DBSNP=rs11540654,HGMD=CM984590	0.65	JGKWLNMTIHUPAOBVC5F23Q46SR1DE			1	0	1	0	GT=1/1;ARF=1.00;QD=27.2;DP=37;GQ=99;CI=HMP;CO=1									GRCh38; NM_001126114.3:c.329G>T; NP_001119586.1:p.Arg110Leu; missense	Pathogenic/ Likely pathogenic​
17	7676040	7676040	1	C	A	SNV		ENSG00000141510	ENST00000610292	ENSP00000478219	-1	protein_coding	TP53	CCDS73969.1	NM_001126118.1	-47	-233	CDS.3	MISSENSE	MISSENSE	c.212G>T	p.Arg71Leu			DBSNP=rs11540654,HGMD=CM984590	0.65	JGKWLNMTIHUPAOBVC5F23Q46SR1DE			1	0	1	0	GT=1/1;ARF=1.00;QD=27.2;DP=37;GQ=99;CI=HMP;CO=1									GRCh38: NM_001126118.2:c.212G>T; NP_001119590.1:p.Arg71Leu; missense	Pathogenic/ Likely pathogenic​
VmCub1
Chr	Start	End	Size	Ref	Alt	Type	Region	EnsGene	EnsRNA	EnsProt	Strand	Biotype	HGNC	CCDS	RefSeq	Dist5SS	Dist3SS	MutPos	ConseqClass	Consequence	MutCDNA	MutProt	InhouseFreq	VarFreq	VarInfo	MedPred	Prediction	Phen-P	Phenomizer Description	GrA	GrB	BrdA	BrdB	A:PRID4683:SID137767:AID124244:Scaber									Clinvar Database	Pathogenicity Prediction
17	7675088	7675088	1	C	T	SNV		ENSG00000141510	ENST00000619186	ENSP00000484375	-1	protein_coding	TP53	CCDS73963.1	NM_001126115.1,NM_001276697.1	-36		CDS.1	MISSENSE	MISSENSE	c.47G>A	p.Arg16His	0.002	8.96e-06	DBSNP=rs28934578,HGMD=CM951224,CLINVAR=12374	0.85	ABEKGNPWMIJCLQ61TR2H4DSFUOV53			1	0	1	0	GT=1/1;ARF=0.94;QD=32.3;DP=136;GQ=99;CI=HMP;CO=1									GRCh38; NM_001276697.3:c.47G>A; NP_001263626.1:p.Arg16His; missense	Pathogenic
17	7675088	7675088	1	C	T	SNV		ENSG00000141510	ENST00000455263	ENSP00000398846	-1	protein_coding	TP53	CCDS45605.1	NM_001126113.2,NM_001276695.1	-36	-149	CDS.5	MISSENSE	MISSENSE	c.524G>A	p.Arg175His	0.002	8.96e-06	DBSNP=rs28934578,HGMD=CM951224,CLINVAR=12374	0.85	ABEKGNPWMIJCLQ61TR2H4DSFUOV53			1	0	1	0	GT=1/1;ARF=0.94;QD=32.3;DP=136;GQ=99;CI=HMP;CO=1									GRCh38; NM_001126113.3:c.524G>A; NP_001119585.1:p.Arg175His; missense	Pathogenic
17	7675088	7675088	1	C	T	SNV		ENSG00000141510	ENST00000504290	ENSP00000484409	-1	protein_coding	TP53	CCDS73967.1		-36		CDS.1	MISSENSE	MISSENSE	c.128G>A	p.Arg43His	0.002	8.96e-06	DBSNP=rs28934578,HGMD=CM951224,CLINVAR=12374	0.85	ABEKGNPWMIJCLQ61TR2H4DSFUOV53			1	0	1	0	GT=1/1;ARF=0.94;QD=32.3;DP=136;GQ=99;CI=HMP;CO=1									GRCh38; NM_001126115.2:c.128G>A; NP_001119587.1:p.Arg43His; missense	Pathogenic
17	7675088	7675088	1	C	T	SNV		ENSG00000141510	ENST00000610292	ENSP00000478219	-1	protein_coding	TP53	CCDS73969.1	NM_001126118.1	-36	-149	CDS.4	MISSENSE	MISSENSE	c.407G>A	p.Arg136His	0.002	8.96e-06	DBSNP=rs28934578,HGMD=CM951224,CLINVAR=12374	0.85	ABEKGNPWMIJCLQ61TR2H4DSFUOV53			1	0	1	0	GT=1/1;ARF=0.94;QD=32.3;DP=136;GQ=99;CI=HMP;CO=1									GRCh38; NM_001126118.2:c.407G>A; NP_001119590.1:p.Arg136His; missense	Pathogenic
17	7675088	7675088	1	C	T	SNV		ENSG00000141510	ENST00000622645	ENSP00000482222	-1	protein_coding	TP53	CCDS73971.1	NM_001276696.1	-36	-149	CDS.5	MISSENSE	MISSENSE	c.407G>A	p.Arg136His	0.002	8.96e-06	DBSNP=rs28934578,HGMD=CM951224,CLINVAR=12374	0.85	ABEKGNPWMIJCLQ61TR2H4DSFUOV53			1	0	1	0	GT=1/1;ARF=0.94;QD=32.3;DP=136;GQ=99;CI=HMP;CO=1									GRCh38; NM_001276696.3:c.407G>A; NP_001263625.1:p.Arg136His; missense	Pathogenic
17	7675088	7675088	1	C	T	SNV		ENSG00000141510	ENST00000510385	ENSP00000478499	-1	protein_coding	TP53	CCDS73968.1	NM_001126116.1,NM_001276698.1	-36		CDS.1	MISSENSE	MISSENSE	c.128G>A	p.Arg43His	0.002	8.96e-06	DBSNP=rs28934578,HGMD=CM951224,CLINVAR=12374	0.85	ABEKGNPWMIJCLQ61TR2H4DSFUOV53			1	0	1	0	GT=1/1;ARF=0.94;QD=32.3;DP=136;GQ=99;CI=HMP;CO=1									GRCh38; NM_001126116.2:c.128G>A; NP_001119588.1:p.Arg43His; missense	Pathogenic
J82
Chr	Start	End	Size	Ref	Alt	Type	Region	EnsGene	EnsRNA	EnsProt	Strand	Biotype	HGNC	CCDS	RefSeq	Dist5SS	Dist3SS	MutPos	ConseqClass	Consequence	MutCDNA	MutProt	RegulationInfo	PosFilter	VarInfo	VarName	VarFreq	ConseqFilter	CallerInfo	Prediction	GrA	GrB	BrdA	BrdB	A:PRID1609:AID50751:P4								Clinvar Database	Pathogenicity Prediction
17	7576886	7576886	1	C	G	SNP	RS=4.2 / Target Dist -89	ENSG00000141510	ENST00000455263	ENSP00000398846	-1	protein_coding	TP53	CCDS45605.1	NM_001126117.1	-34	-41	CDS.9	MISSENSE	ESE_LOSS;NON_SYNONYMOUS_CODING;POLYA_LOSS	c.960G>C	p.K320N	ESR=57,0,26,0;PYA0=AAGAAA,3.7;S3=8.15;S5=7.64	CDS				X---XX	[GATK:ABHet=0.57;AC=1;AF=0.50;AN=2;BaseCounts=0,49,37,0;BaseQRankSum=-0.253;DP=86;Dels=0.00;FS=38.389;HRun=0;HaplotypeScore=0.0000;LowMQ=0.0000,0.0000,86;MQ=56.47;MQ0=0;MQRankSum=2.835;QD=13.80;ReadPosRankSum=-0.218;SB=-265.42;GT=0/1;AD=49,37;DP=86;GQ=99;PL=1217,0,1545;LOC_ORG=7576886,C,G];[MPILEUP:DP=85;VDB=0.0518;AF1=0.5;AC1=1;DP4=14,34,26,10;MQ=57;FQ=225;PV4=0.00014,0.039,1,0.34;PL=255,0,255;S…	RVIS=-0.25,35.99	1	0	1	0	0/1	0.43	0.57	86	1187	GM		2	not found	not found
17	7577127	7577127	1	C	T	SNP	RS=5.1 / TargetDist 38	ENSG00000141510	ENST00000445888	ENSP00000391478	-1	protein_coding	TP53	CCDS11118.1	NM_001126118.1	-109	-29	CDS.8	MISSENSE	ESE2ESS_CHANGE;NON_SYNONYMOUS_CODING	c.811G>A	p.E271K	ESR=4,14,2,25;S3=3.21;S5=9.85	CDS				X---X-	[GATK:ABHom=1.00;AC=2;AF=1.00;AN=2;BaseCounts=0,0,0,20;DP=20;Dels=0.00;FS=0.000;HRun=1;HaplotypeScore=0.0000;LowMQ=0.0000,0.0000,20;MQ=60.00;MQ0=0;QD=34.42;SB=-0.01;GT=1|1;AD=0,20;DP=20;GQ=60.18;PL=721,60,0;LOC_ORG=7577127,C,T];[MPILEUP:DP=20;VDB=0.0454;AF1=1;AC1=2;DP4=0,0,0,19;MQ=60;FQ=-84;PL=170,57,0;SP=0;LOC_ORG=7577127,C,T]	PPH=3;RVIS=-0.25,35.99	1	0	1	0	1|1	1	0	20	688	GM		2	GRCh37: NM_001126118.2:c.694G>A; NM_001126112.3:c.811G>A; NP_001119590.1:p.Glu232Lys; missense	Conflicting interpretations of pathogenicity​ Likely pathogenic(1); Uncertain significance(3)
